# Supplementary material for: Caregiver‐based perception of disease burden in Schaaf‐Yang syndrome
Source: PubMed Central journal article supplement — Mol Genet Genomic Med. 2023 Aug 3;11(12):e2262. doi: 10.1002/mgg3.2262 (PMC10724517; doi:10.1002/mgg3.2262), 2023-08-03
Supplement: MGG3-11-e2262-s001.pdf [file MGG3-11-e2262-s001.pdf]

## SYS Patient Voices Questionnaire

In an effort to identify unmet medical needs and treatment priorities for the SYS community, FPWR has created a questionnaire for parents and caregivers to complete. The survey results, with identifying information removed, will be shared with the SYS community, and may also be shared with representatives from the US Food and Drug Administration and representatives of pharmaceutical companies and academic institutions interested in developing new drugs for SYS.

If you are the primary caregiver of a person or persons with SYS and you wish to participate in this survey, please click the button below.

If you have more than one immediate family member with SYS, you will be able to provide information about the age of the second family member and the impact SYS has for that person at the end of the survey.

\* 1. What is your relationship to the person(s) with Schaff-Yang syndrome (SYS)?

- Parent
- Legal Guardian
- Sibling
- Professional Caregiver
- Other (please specify)

\* 2. What is the type of mutation?

- De novo (no other family history, new mutation)
- Inherited (others in the family may have SYS)
- Don't know

If you know the exact mutation in the MAGEL2, please enter it here.

\* 3. What is the age of the first immediate family member with SYS? (If you have more than one family member with SYS you will be able to enter the age of the person at the end of the survey)

- |                                       |                                                |
|---------------------------------------|------------------------------------------------|
| <input type="checkbox"/> 0-11 months  | <input type="checkbox"/> 13 years old          |
| <input type="checkbox"/> 1 year old   | <input type="checkbox"/> 14 years old          |
| <input type="checkbox"/> 2 years old  | <input type="checkbox"/> 15 years old          |
| <input type="checkbox"/> 3 years old  | <input type="checkbox"/> 16 years old          |
| <input type="checkbox"/> 4 years old  | <input type="checkbox"/> 17 years old          |
| <input type="checkbox"/> 5 years old  | <input type="checkbox"/> 18 years old          |
| <input type="checkbox"/> 6 years old  | <input type="checkbox"/> 19 years old          |
| <input type="checkbox"/> 7 years old  | <input type="checkbox"/> 20 years old          |
| <input type="checkbox"/> 8 years old  | <input type="checkbox"/> 21 years old          |
| <input type="checkbox"/> 9 years old  | <input type="checkbox"/> 22 years old          |
| <input type="checkbox"/> 10 years old | <input type="checkbox"/> 23 years old          |
| <input type="checkbox"/> 11 years old | <input type="checkbox"/> 24 years old          |
| <input type="checkbox"/> 12 years old | <input type="checkbox"/> 25 years old or older |

\* 4. What major symptoms has the person with SYS experienced so far? (check all that apply)

- |                                                                            |                                                                                                               |
|----------------------------------------------------------------------------|---------------------------------------------------------------------------------------------------------------|
| <input type="checkbox"/> Hypotonia / Weak muscles                          | <input type="checkbox"/> Osteoporosis / Weak bones                                                            |
| <input type="checkbox"/> Contractures                                      | <input type="checkbox"/> Seizures                                                                             |
| <input type="checkbox"/> Feeding problems / Inability to eat independently | <input type="checkbox"/> Sleep problems                                                                       |
| <input type="checkbox"/> Developmental delay / Intellectual disability     | <input type="checkbox"/> Breathing problems                                                                   |
| <input type="checkbox"/> Autism Spectrum Disorder                          | <input type="checkbox"/> Excessive hunger (hyperphagia)                                                       |
| <input type="checkbox"/> Growth Hormone Deficiency                         | <input type="checkbox"/> Communication / Speech delays or difficulties                                        |
| <input type="checkbox"/> Mobility problems / Difficulty walking            | <input type="checkbox"/> Difficult behavior                                                                   |
| <input type="checkbox"/> Hypogonadism / Incomplete sexual development      | <input type="checkbox"/> Anxiety                                                                              |
| <input type="checkbox"/> Scoliosis                                         | <input type="checkbox"/> Eye problems (ex. myopia, esotropia, strabismus, ptosis, cortical vision impairment) |
| <input type="checkbox"/> Gastrointestinal problems / Chronic constipation  | <input type="checkbox"/> None of the above                                                                    |

Other (please specify)

\* 5. Please rate the importance of how these issues impact the life of the person with SYS in their day-to-day living right now?

Not Important      Somewhat Important      Very Important      Most Important

Hypotonia / Weak muscles

|                                                                                                  | Not Important         | Somewhat Important    | Very Important        | Most Important        |
|--------------------------------------------------------------------------------------------------|-----------------------|-----------------------|-----------------------|-----------------------|
| Contractures                                                                                     | <input type="radio"/> | <input type="radio"/> | <input type="radio"/> | <input type="radio"/> |
| Feeding problems /<br>Inability to eat<br>independently                                          | <input type="radio"/> | <input type="radio"/> | <input type="radio"/> | <input type="radio"/> |
| Developmental delay /<br>Intellectual disability                                                 | <input type="radio"/> | <input type="radio"/> | <input type="radio"/> | <input type="radio"/> |
| Autism Spectrum<br>Disorder                                                                      | <input type="radio"/> | <input type="radio"/> | <input type="radio"/> | <input type="radio"/> |
| Growth Hormone<br>Deficiency                                                                     | <input type="radio"/> | <input type="radio"/> | <input type="radio"/> | <input type="radio"/> |
| Mobility problems /<br>Difficulty walking                                                        | <input type="radio"/> | <input type="radio"/> | <input type="radio"/> | <input type="radio"/> |
| Hypogonadism /<br>Incomplete sexual<br>development                                               | <input type="radio"/> | <input type="radio"/> | <input type="radio"/> | <input type="radio"/> |
| Scoliosis                                                                                        | <input type="radio"/> | <input type="radio"/> | <input type="radio"/> | <input type="radio"/> |
| Gastrointestinal<br>problems / Chronic<br>constipation                                           | <input type="radio"/> | <input type="radio"/> | <input type="radio"/> | <input type="radio"/> |
| Osteoporosis / Weak<br>bones                                                                     | <input type="radio"/> | <input type="radio"/> | <input type="radio"/> | <input type="radio"/> |
| Seizures                                                                                         | <input type="radio"/> | <input type="radio"/> | <input type="radio"/> | <input type="radio"/> |
| Sleep problems                                                                                   | <input type="radio"/> | <input type="radio"/> | <input type="radio"/> | <input type="radio"/> |
| Breathing problems                                                                               | <input type="radio"/> | <input type="radio"/> | <input type="radio"/> | <input type="radio"/> |
| Excessive hunger<br>(hyperphagia)                                                                | <input type="radio"/> | <input type="radio"/> | <input type="radio"/> | <input type="radio"/> |
| Communication /<br>Speech delays or<br>difficulties                                              | <input type="radio"/> | <input type="radio"/> | <input type="radio"/> | <input type="radio"/> |
| Difficult behavior                                                                               | <input type="radio"/> | <input type="radio"/> | <input type="radio"/> | <input type="radio"/> |
| Anxiety                                                                                          | <input type="radio"/> | <input type="radio"/> | <input type="radio"/> | <input type="radio"/> |
| Eye problems (ex.<br>myopia, esotropia,<br>strabismus, ptosis,<br>cortical vision<br>impairment) | <input type="radio"/> | <input type="radio"/> | <input type="radio"/> | <input type="radio"/> |
| Other (as listed above in<br>Question #4)                                                        | <input type="radio"/> | <input type="radio"/> | <input type="radio"/> | <input type="radio"/> |

\* 6. How much do you worry about these issues when thinking about the future of the person with SYS?

|                                                                                      | It is not a worry     | I worry about it a little bit | I worry about it a lot | I worry about this the most |
|--------------------------------------------------------------------------------------|-----------------------|-------------------------------|------------------------|-----------------------------|
| Hypotonia / Weak muscles                                                             | <input type="radio"/> | <input type="radio"/>         | <input type="radio"/>  | <input type="radio"/>       |
| Contractures                                                                         | <input type="radio"/> | <input type="radio"/>         | <input type="radio"/>  | <input type="radio"/>       |
| Feeding problems / Inability to eat independently                                    | <input type="radio"/> | <input type="radio"/>         | <input type="radio"/>  | <input type="radio"/>       |
| Developmental delay / Intellectual disability                                        | <input type="radio"/> | <input type="radio"/>         | <input type="radio"/>  | <input type="radio"/>       |
| Autism Spectrum Disorder                                                             | <input type="radio"/> | <input type="radio"/>         | <input type="radio"/>  | <input type="radio"/>       |
| Growth Hormone Deficiency                                                            | <input type="radio"/> | <input type="radio"/>         | <input type="radio"/>  | <input type="radio"/>       |
| Mobility problems / Difficulty walking                                               | <input type="radio"/> | <input type="radio"/>         | <input type="radio"/>  | <input type="radio"/>       |
| Hypogonadism / Incomplete sexual development                                         | <input type="radio"/> | <input type="radio"/>         | <input type="radio"/>  | <input type="radio"/>       |
| Scoliosis                                                                            | <input type="radio"/> | <input type="radio"/>         | <input type="radio"/>  | <input type="radio"/>       |
| Gastrointestinal problems / Chronic constipation                                     | <input type="radio"/> | <input type="radio"/>         | <input type="radio"/>  | <input type="radio"/>       |
| Osteoporosis / Weak bones                                                            | <input type="radio"/> | <input type="radio"/>         | <input type="radio"/>  | <input type="radio"/>       |
| Seizures                                                                             | <input type="radio"/> | <input type="radio"/>         | <input type="radio"/>  | <input type="radio"/>       |
| Sleep problems                                                                       | <input type="radio"/> | <input type="radio"/>         | <input type="radio"/>  | <input type="radio"/>       |
| Breathing problems                                                                   | <input type="radio"/> | <input type="radio"/>         | <input type="radio"/>  | <input type="radio"/>       |
| Excessive hunger (hyperphagia)                                                       | <input type="radio"/> | <input type="radio"/>         | <input type="radio"/>  | <input type="radio"/>       |
| Communication / Speech delays or difficulties                                        | <input type="radio"/> | <input type="radio"/>         | <input type="radio"/>  | <input type="radio"/>       |
| Difficult behavior                                                                   | <input type="radio"/> | <input type="radio"/>         | <input type="radio"/>  | <input type="radio"/>       |
| Anxiety                                                                              | <input type="radio"/> | <input type="radio"/>         | <input type="radio"/>  | <input type="radio"/>       |
| Eye problems (ex. myopia, esotropia, strabismus, ptosis, cortical vision impairment) | <input type="radio"/> | <input type="radio"/>         | <input type="radio"/>  | <input type="radio"/>       |
| Other (as listed above in question #4)                                               | <input type="radio"/> | <input type="radio"/>         | <input type="radio"/>  | <input type="radio"/>       |

\* 7. Overall, how would you rate the impact of SYS on the day-to-day life of person with SYS so far?

- Little or no impact
- Mild - causes occasional disruptions or manageable challenges in normal daily living
- Moderate – causes regular disruptions or occasional difficult challenges in normal daily living
- Severe – causes frequent and severe disruptions in normal daily living

\* 8. Overall, how would you rate the impact of SYS on the PRIMARY CAREGIVER of the person with SYS so far?

- Little or no impact
- Mild - causes occasional disruptions or manageable challenges in the life of the primary caregiver
- Moderate – causes regular disruptions or occasional difficult challenges in the life of the primary caregiver
- Severe – causes frequent and severe disruptions in the life of the primary caregiver

\* 9. Overall, how would you rate the impact of SYS on the FAMILY of the person with SYS so far?

- Little or no impact
- Mild - causes occasional disruptions or manageable challenges in the lives of family members
- Moderate – causes regular disruptions or occasional difficult challenges in the lives of family members
- Severe – causes frequent and severe disruptions in the lives of family members

\* 10. How would you rate the impact of SYS on the ability of the person with SYS to reach long term goals? (education, job opportunities, independent living)

- Little or no impact
- Mild – has caused small changes to long term goals
- Moderate – has caused some changes to long term goals
- Severe – has caused major changes to long term goals

\* 11. To what degree has SYS affected these aspects of the PRIMARY CAREGIVER'S life?

|                                                              | Little or no impact   | Mild                  | Moderate              | Severe                | Not applicable        |
|--------------------------------------------------------------|-----------------------|-----------------------|-----------------------|-----------------------|-----------------------|
| Financial Impact                                             | <input type="radio"/> |
| Social Impact                                                | <input type="radio"/> |
| Day-to-day living                                            | <input type="radio"/> |
| Ability of the primary caregiver to work outside of the home | <input type="radio"/> |
| Long term goals of the primary caregiver                     | <input type="radio"/> |

\* 12. What treatments are you currently using to manage SYS? (Check all that apply)

- |                                                                             |                                                                |
|-----------------------------------------------------------------------------|----------------------------------------------------------------|
| <input type="checkbox"/> Growth Hormone                                     | <input type="checkbox"/> Speech therapy                        |
| <input type="checkbox"/> CPAP                                               | <input type="checkbox"/> Occupational therapy                  |
| <input type="checkbox"/> G-tube or NG tube                                  | <input type="checkbox"/> ABA therapy                           |
| <input type="checkbox"/> Scoliosis brace                                    | <input type="checkbox"/> GI medications (reflux, constipation) |
| <input type="checkbox"/> Splints, bracing or foot orthoses for contractures | <input type="checkbox"/> Seizure medications                   |
| <input type="checkbox"/> Tonsillectomy and/or adenoidectomy                 | <input type="checkbox"/> Anxiety medications                   |
| <input type="checkbox"/> Physical therapy                                   | <input type="checkbox"/> None of the above                     |

Other (please specify)

\* 13. In thinking about all of the treatments you have used for the person with SYS (including therapies, supplements and drugs) how well do you feel these treatments able to control the symptoms of SYS?

|                                                    | Treatment is not effective | Treatment helps somewhat | Treatment is very helpful | Treatment is helpful but side effects are significant | Not receiving this treatment |
|----------------------------------------------------|----------------------------|--------------------------|---------------------------|-------------------------------------------------------|------------------------------|
| Growth Hormone                                     | <input type="radio"/>      | <input type="radio"/>    | <input type="radio"/>     | <input type="radio"/>                                 | <input type="radio"/>        |
| CPAP                                               | <input type="radio"/>      | <input type="radio"/>    | <input type="radio"/>     | <input type="radio"/>                                 | <input type="radio"/>        |
| G-tube or NG tube                                  | <input type="radio"/>      | <input type="radio"/>    | <input type="radio"/>     | <input type="radio"/>                                 | <input type="radio"/>        |
| Scoliosis brace                                    | <input type="radio"/>      | <input type="radio"/>    | <input type="radio"/>     | <input type="radio"/>                                 | <input type="radio"/>        |
| Splints, bracing or foot orthoses for contractures | <input type="radio"/>      | <input type="radio"/>    | <input type="radio"/>     | <input type="radio"/>                                 | <input type="radio"/>        |
| Tonsillectomy and/or adenoidectomy                 | <input type="radio"/>      | <input type="radio"/>    | <input type="radio"/>     | <input type="radio"/>                                 | <input type="radio"/>        |
| Physical therapy                                   | <input type="radio"/>      | <input type="radio"/>    | <input type="radio"/>     | <input type="radio"/>                                 | <input type="radio"/>        |
| Speech therapy                                     | <input type="radio"/>      | <input type="radio"/>    | <input type="radio"/>     | <input type="radio"/>                                 | <input type="radio"/>        |
| Occupational therapy                               | <input type="radio"/>      | <input type="radio"/>    | <input type="radio"/>     | <input type="radio"/>                                 | <input type="radio"/>        |
| ABA therapy (Applied Behavior Analysis)            | <input type="radio"/>      | <input type="radio"/>    | <input type="radio"/>     | <input type="radio"/>                                 | <input type="radio"/>        |
| GI medications (reflux, constipation)              | <input type="radio"/>      | <input type="radio"/>    | <input type="radio"/>     | <input type="radio"/>                                 | <input type="radio"/>        |
| Seizure medications                                | <input type="radio"/>      | <input type="radio"/>    | <input type="radio"/>     | <input type="radio"/>                                 | <input type="radio"/>        |
| Anxiety medications                                | <input type="radio"/>      | <input type="radio"/>    | <input type="radio"/>     | <input type="radio"/>                                 | <input type="radio"/>        |
| Other (as reported in question #12)                | <input type="radio"/>      | <input type="radio"/>    | <input type="radio"/>     | <input type="radio"/>                                 | <input type="radio"/>        |

\* 14. Assuming there is no complete cure for SYS, what specific things would you look for in an ideal treatment for SYS?

|                                                        | Not at all important  | Somewhat important    | Very important        | Most Important        |
|--------------------------------------------------------|-----------------------|-----------------------|-----------------------|-----------------------|
| Improves bone health                                   | <input type="radio"/> | <input type="radio"/> | <input type="radio"/> | <input type="radio"/> |
| Improves ability to communicate / speech improvement   | <input type="radio"/> | <input type="radio"/> | <input type="radio"/> | <input type="radio"/> |
| Improves behavior                                      | <input type="radio"/> | <input type="radio"/> | <input type="radio"/> | <input type="radio"/> |
| Improves mobility                                      | <input type="radio"/> | <input type="radio"/> | <input type="radio"/> | <input type="radio"/> |
| Improves gastrointestinal health, reduces constipation | <input type="radio"/> | <input type="radio"/> | <input type="radio"/> | <input type="radio"/> |
| Improves positive social interaction                   | <input type="radio"/> | <input type="radio"/> | <input type="radio"/> | <input type="radio"/> |
| Improves sleep                                         | <input type="radio"/> | <input type="radio"/> | <input type="radio"/> | <input type="radio"/> |
| Improves intellect / development                       | <input type="radio"/> | <input type="radio"/> | <input type="radio"/> | <input type="radio"/> |
| Improves stamina / activity                            | <input type="radio"/> | <input type="radio"/> | <input type="radio"/> | <input type="radio"/> |

15. Are you participating in an SYS registry?

- Yes, the Simons Foundation Magel2 Registry
- Yes, the Global PWS Registry
- Yes, both the Simons Foundation and Global PWS Registry
- No, I am not participating in a registry

16. In what country do you live?

17. Feel free to provide additional comments on the impact of SYS on your loved one, on you or on your family.

18. Feel free to provide additional comments on whether current treatments are adequately addressing the symptoms of SYS.

19. Feel free to provide any additional comments about your views on what SYS research should be prioritized.

\* 20. Do you have more than 1 immediate family member with SYS?

No

Yes



## SYS Patient Voices Questionnaire

\* 21. What is the age of the second immediate family member with SYS?

- |                                       |                                                |
|---------------------------------------|------------------------------------------------|
| <input type="checkbox"/> 0-11 months  | <input type="checkbox"/> 13 years old          |
| <input type="checkbox"/> 1 year old   | <input type="checkbox"/> 14 years old          |
| <input type="checkbox"/> 2 years old  | <input type="checkbox"/> 15 years old          |
| <input type="checkbox"/> 3 years old  | <input type="checkbox"/> 16 years old          |
| <input type="checkbox"/> 4 years old  | <input type="checkbox"/> 17 years old          |
| <input type="checkbox"/> 5 years old  | <input type="checkbox"/> 18 years old          |
| <input type="checkbox"/> 6 years old  | <input type="checkbox"/> 19 years old          |
| <input type="checkbox"/> 7 years old  | <input type="checkbox"/> 20 years old          |
| <input type="checkbox"/> 8 years old  | <input type="checkbox"/> 21 years old          |
| <input type="checkbox"/> 9 years old  | <input type="checkbox"/> 22 years old          |
| <input type="checkbox"/> 10 years old | <input type="checkbox"/> 23 years old          |
| <input type="checkbox"/> 11 years old | <input type="checkbox"/> 24 years old          |
| <input type="checkbox"/> 12 years old | <input type="checkbox"/> 25 years old or older |

\* 22. What major symptoms has the second immediate family member with SYS experienced so far? (check all that apply)

- |                                                                            |                                                                        |
|----------------------------------------------------------------------------|------------------------------------------------------------------------|
| <input type="checkbox"/> Hypotonia / Weak muscles                          | <input type="checkbox"/> Osteoporosis / Weak bones                     |
| <input type="checkbox"/> Contractures                                      | <input type="checkbox"/> Seizures                                      |
| <input type="checkbox"/> Feeding problems / Inability to eat independently | <input type="checkbox"/> Sleep problems                                |
| <input type="checkbox"/> Developmental delay / Intellectual disability     | <input type="checkbox"/> Breathing problems                            |
| <input type="checkbox"/> Autism Spectrum Disorder                          | <input type="checkbox"/> Excessive hunger (hyperphagia)                |
| <input type="checkbox"/> Growth Hormone Deficiency                         | <input type="checkbox"/> Communication / Speech delays or difficulties |
| <input type="checkbox"/> Mobility problems / Difficulty walking            | <input type="checkbox"/> Difficult behavior                            |
| <input type="checkbox"/> Hypogonadism / Incomplete sexual development      | <input type="checkbox"/> Anxiety                                       |
| <input type="checkbox"/> Scoliosis                                         | <input type="checkbox"/> Eye problems (myopia, esotropia, strabismus)  |
| <input type="checkbox"/> Gastrointestinal problems / Chronic constipation  | <input type="checkbox"/> None of the above                             |

Other (please specify)

\* 23. Please rate the importance of how these issues impact the life of the second immediate family member with SYS in their day-to-day living right now?

|                                                                                      | Not Important         | Somewhat Important    | Very Important        | Most Important        |
|--------------------------------------------------------------------------------------|-----------------------|-----------------------|-----------------------|-----------------------|
| Hypotonia / Weak muscles                                                             | <input type="radio"/> | <input type="radio"/> | <input type="radio"/> | <input type="radio"/> |
| Contractures                                                                         | <input type="radio"/> | <input type="radio"/> | <input type="radio"/> | <input type="radio"/> |
| Feeding problems / Inability to eat independently                                    | <input type="radio"/> | <input type="radio"/> | <input type="radio"/> | <input type="radio"/> |
| Developmental delay / Intellectual disability                                        | <input type="radio"/> | <input type="radio"/> | <input type="radio"/> | <input type="radio"/> |
| Autism Spectrum Disorder                                                             | <input type="radio"/> | <input type="radio"/> | <input type="radio"/> | <input type="radio"/> |
| Growth Hormone Deficiency                                                            | <input type="radio"/> | <input type="radio"/> | <input type="radio"/> | <input type="radio"/> |
| Mobility problems / Difficulty walking                                               | <input type="radio"/> | <input type="radio"/> | <input type="radio"/> | <input type="radio"/> |
| Hypogonadism / Incomplete sexual development                                         | <input type="radio"/> | <input type="radio"/> | <input type="radio"/> | <input type="radio"/> |
| Scoliosis                                                                            | <input type="radio"/> | <input type="radio"/> | <input type="radio"/> | <input type="radio"/> |
| Gastrointestinal problems / Chronic constipation                                     | <input type="radio"/> | <input type="radio"/> | <input type="radio"/> | <input type="radio"/> |
| Osteoporosis / Weak bones                                                            | <input type="radio"/> | <input type="radio"/> | <input type="radio"/> | <input type="radio"/> |
| Seizures                                                                             | <input type="radio"/> | <input type="radio"/> | <input type="radio"/> | <input type="radio"/> |
| Sleep problems                                                                       | <input type="radio"/> | <input type="radio"/> | <input type="radio"/> | <input type="radio"/> |
| Breathing problems                                                                   | <input type="radio"/> | <input type="radio"/> | <input type="radio"/> | <input type="radio"/> |
| Excessive hunger (hyperphagia)                                                       | <input type="radio"/> | <input type="radio"/> | <input type="radio"/> | <input type="radio"/> |
| Communication / Speech delays or difficulties                                        | <input type="radio"/> | <input type="radio"/> | <input type="radio"/> | <input type="radio"/> |
| Difficult behavior                                                                   | <input type="radio"/> | <input type="radio"/> | <input type="radio"/> | <input type="radio"/> |
| Anxiety                                                                              | <input type="radio"/> | <input type="radio"/> | <input type="radio"/> | <input type="radio"/> |
| Eye problems (ex. myopia, esotropia, strabismus, ptosis, cortical vision impairment) | <input type="radio"/> | <input type="radio"/> | <input type="radio"/> | <input type="radio"/> |
| Other (as listed above in question #20)                                              | <input type="radio"/> | <input type="radio"/> | <input type="radio"/> | <input type="radio"/> |

\* 24. How much do you worry about these issues when thinking about the future of the second immediate

family member with SYS?

|                                                                                      | It is not a worry     | I worry about it a little bit | I worry about it a lot | I worry about this the most |
|--------------------------------------------------------------------------------------|-----------------------|-------------------------------|------------------------|-----------------------------|
| Hypotonia / Weak muscles                                                             | <input type="radio"/> | <input type="radio"/>         | <input type="radio"/>  | <input type="radio"/>       |
| Contractures                                                                         | <input type="radio"/> | <input type="radio"/>         | <input type="radio"/>  | <input type="radio"/>       |
| Feeding problems / Inability to eat independently                                    | <input type="radio"/> | <input type="radio"/>         | <input type="radio"/>  | <input type="radio"/>       |
| Developmental delay / Intellectual disability                                        | <input type="radio"/> | <input type="radio"/>         | <input type="radio"/>  | <input type="radio"/>       |
| Autism Spectrum Disorder                                                             | <input type="radio"/> | <input type="radio"/>         | <input type="radio"/>  | <input type="radio"/>       |
| Growth Hormone Deficiency                                                            | <input type="radio"/> | <input type="radio"/>         | <input type="radio"/>  | <input type="radio"/>       |
| Mobility problems / Difficulty walking                                               | <input type="radio"/> | <input type="radio"/>         | <input type="radio"/>  | <input type="radio"/>       |
| Hypogonadism / Incomplete sexual development                                         | <input type="radio"/> | <input type="radio"/>         | <input type="radio"/>  | <input type="radio"/>       |
| Scoliosis                                                                            | <input type="radio"/> | <input type="radio"/>         | <input type="radio"/>  | <input type="radio"/>       |
| Gastrointestinal problems / Chronic constipation                                     | <input type="radio"/> | <input type="radio"/>         | <input type="radio"/>  | <input type="radio"/>       |
| Osteoporosis / Weak bones                                                            | <input type="radio"/> | <input type="radio"/>         | <input type="radio"/>  | <input type="radio"/>       |
| Seizures                                                                             | <input type="radio"/> | <input type="radio"/>         | <input type="radio"/>  | <input type="radio"/>       |
| Sleep problems                                                                       | <input type="radio"/> | <input type="radio"/>         | <input type="radio"/>  | <input type="radio"/>       |
| Breathing problems                                                                   | <input type="radio"/> | <input type="radio"/>         | <input type="radio"/>  | <input type="radio"/>       |
| Excessive hunger (hyperphagia)                                                       | <input type="radio"/> | <input type="radio"/>         | <input type="radio"/>  | <input type="radio"/>       |
| Communication / Speech delays or difficulties                                        | <input type="radio"/> | <input type="radio"/>         | <input type="radio"/>  | <input type="radio"/>       |
| Difficult behavior                                                                   | <input type="radio"/> | <input type="radio"/>         | <input type="radio"/>  | <input type="radio"/>       |
| Anxiety                                                                              | <input type="radio"/> | <input type="radio"/>         | <input type="radio"/>  | <input type="radio"/>       |
| Eye problems (ex. myopia, esotropia, strabismus, ptosis, cortical vision impairment) | <input type="radio"/> | <input type="radio"/>         | <input type="radio"/>  | <input type="radio"/>       |

|                                         |                       |                               |                        |                             |
|-----------------------------------------|-----------------------|-------------------------------|------------------------|-----------------------------|
|                                         | It is not a worry     | I worry about it a little bit | I worry about it a lot | I worry about this the most |
| Other (as listed above in question #20) | <input type="radio"/> | <input type="radio"/>         | <input type="radio"/>  | <input type="radio"/>       |

\* 25. Overall, how would you rate the impact of SYS on the day-to-day life of second immediate family member with SYS so far?

- Little or no impact
- Mild - causes occasional disruptions or manageable challenges in normal daily living
- Moderate – causes regular disruptions or occasional difficult challenges in normal daily living
- Severe – causes frequent and severe disruptions in normal daily living

\* 26. How would you rate the impact SYS has on the second immediate family member with SYS to reach long term goals? (education, job opportunities, independent living)

- Little or no impact
- Mild – has caused small changes to long term goals
- Moderate – has caused some changes to long term goals
- Severe – has caused major changes to long term goals

\* 27. What treatments are you currently using to manage SYS for the second immediate family member? (Check all that apply)

- |                                                                             |                                                                |
|-----------------------------------------------------------------------------|----------------------------------------------------------------|
| <input type="checkbox"/> Growth Hormone                                     | <input type="checkbox"/> Speech therapy                        |
| <input type="checkbox"/> CPAP                                               | <input type="checkbox"/> Occupational therapy                  |
| <input type="checkbox"/> G-tube or NG tube                                  | <input type="checkbox"/> ABA therapy                           |
| <input type="checkbox"/> Scoliosis brace                                    | <input type="checkbox"/> GI medications (reflux, constipation) |
| <input type="checkbox"/> Splints, bracing or foot orthoses for contractures | <input type="checkbox"/> Seizure medications                   |
| <input type="checkbox"/> Tonsillectomy and/or adenoidectomy                 | <input type="checkbox"/> Anxiety medications                   |
| <input type="checkbox"/> Physical therapy                                   | <input type="checkbox"/> None of the above                     |

Other (please specify)

\* 28. In thinking about all of the treatments you have used for the second immediate family member with SYS (including therapies, supplements and drugs) how well do you feel these treatments able to control the symptoms of SYS?

|                                                    | Treatment is not effective | Treatment helps somewhat | Treatment is very helpful | Treatment is helpful but side effects are significant | Not receiving this treatment |
|----------------------------------------------------|----------------------------|--------------------------|---------------------------|-------------------------------------------------------|------------------------------|
| Growth Hormone                                     | <input type="radio"/>      | <input type="radio"/>    | <input type="radio"/>     | <input type="radio"/>                                 | <input type="radio"/>        |
| CPAP                                               | <input type="radio"/>      | <input type="radio"/>    | <input type="radio"/>     | <input type="radio"/>                                 | <input type="radio"/>        |
| G-tube or NG tube                                  | <input type="radio"/>      | <input type="radio"/>    | <input type="radio"/>     | <input type="radio"/>                                 | <input type="radio"/>        |
| Scoliosis brace                                    | <input type="radio"/>      | <input type="radio"/>    | <input type="radio"/>     | <input type="radio"/>                                 | <input type="radio"/>        |
| Splints, bracing or foot orthoses for contractures | <input type="radio"/>      | <input type="radio"/>    | <input type="radio"/>     | <input type="radio"/>                                 | <input type="radio"/>        |
| Tonsillectomy and/or adenoidectomy                 | <input type="radio"/>      | <input type="radio"/>    | <input type="radio"/>     | <input type="radio"/>                                 | <input type="radio"/>        |
| Physical therapy                                   | <input type="radio"/>      | <input type="radio"/>    | <input type="radio"/>     | <input type="radio"/>                                 | <input type="radio"/>        |
| Speech therapy                                     | <input type="radio"/>      | <input type="radio"/>    | <input type="radio"/>     | <input type="radio"/>                                 | <input type="radio"/>        |
| Occupational therapy                               | <input type="radio"/>      | <input type="radio"/>    | <input type="radio"/>     | <input type="radio"/>                                 | <input type="radio"/>        |
| ABA therapy (Applied Behavior Analysis)            | <input type="radio"/>      | <input type="radio"/>    | <input type="radio"/>     | <input type="radio"/>                                 | <input type="radio"/>        |
| GI medications (reflux, constipation)              | <input type="radio"/>      | <input type="radio"/>    | <input type="radio"/>     | <input type="radio"/>                                 | <input type="radio"/>        |
| Seizure medications                                | <input type="radio"/>      | <input type="radio"/>    | <input type="radio"/>     | <input type="radio"/>                                 | <input type="radio"/>        |
| Anxiety medications                                | <input type="radio"/>      | <input type="radio"/>    | <input type="radio"/>     | <input type="radio"/>                                 | <input type="radio"/>        |
| Other (as reported in question #24)                | <input type="radio"/>      | <input type="radio"/>    | <input type="radio"/>     | <input type="radio"/>                                 | <input type="radio"/>        |
